# Supplementary material for: Stimulation of a ventrolateral prefrontal-amygdala circuit modulates impulsivity in Borderline Personality Disorder
Source: Research Square preprint supplement (doi:10.21203/rs.3.rs-7075339/v1), 2025-07-15
Supplement: Supplementary file 1 [file e8b438d4b7fce13ca2253869.docx]

**Supplementary Materials**

**Stimulation of a ventrolateral prefrontal-amygdala circuit modulates impulsivity in Borderline Personality Disorder**

Reza Tadayonnejad, M.D., Ph.D.**ǂ,***,1,2,3, Rani Gera, Ph.D.**ǂ**,3, Stephanie A. Chu, B.S.1,2, Hope Hawkins, B.S. 1,2, Emmily Hovhannisyan, B.A.1,2, Thuc Doan P. Ngo, B.A.1,2, Juliana Corlier, Ph.D.1,2, Andrew F. Leuchter, M.D.1,2

**RESULTS**

***Supplementary tables***

**Type II Wald Chi-Square Tests for the Mixed-Effects Logistic Regression Model Predicting Intertemporal Choice Behavior.**


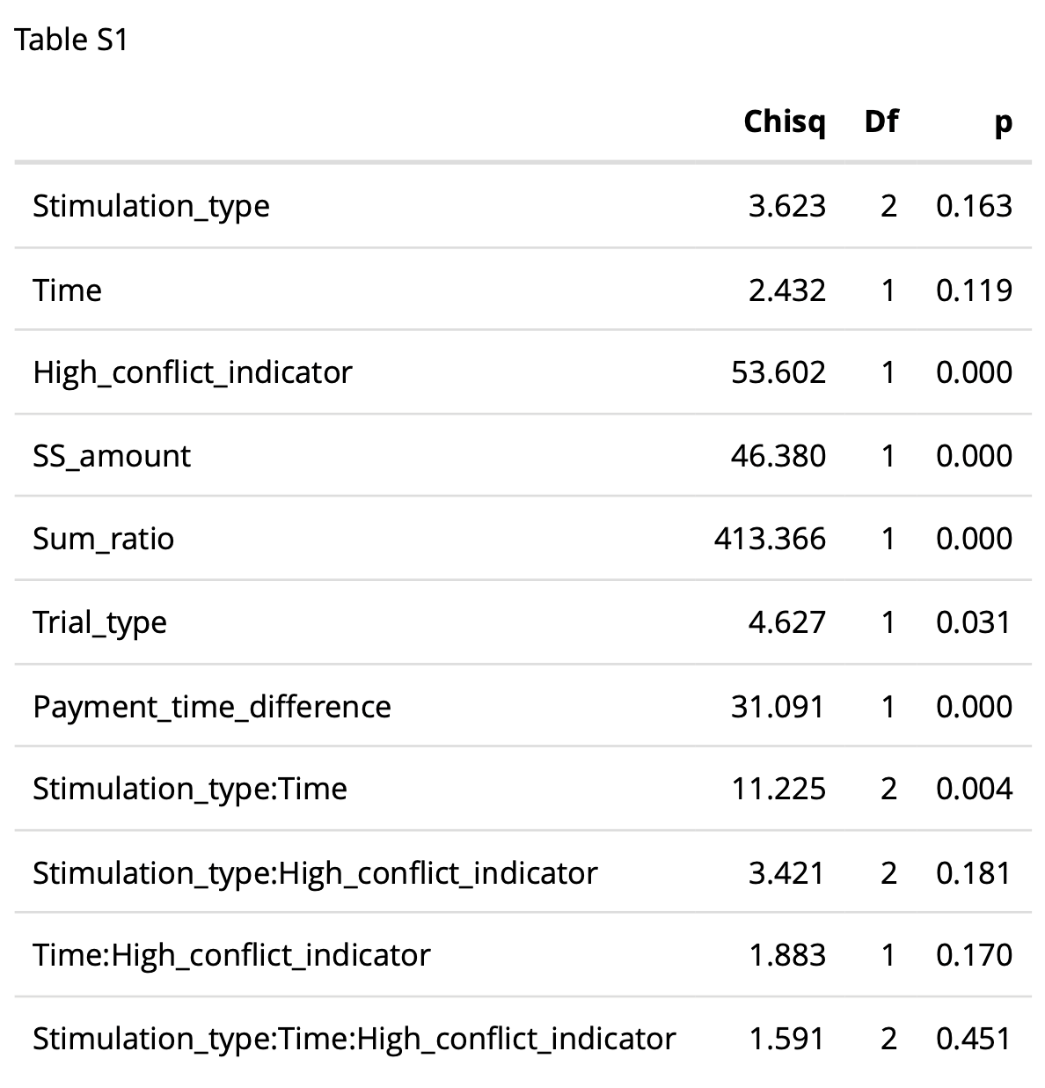


**Logistic Regression Model Predicting Intertemporal Choice Behavior. Right vlPFC stimulation and High choice conflict were used as baseline levels**


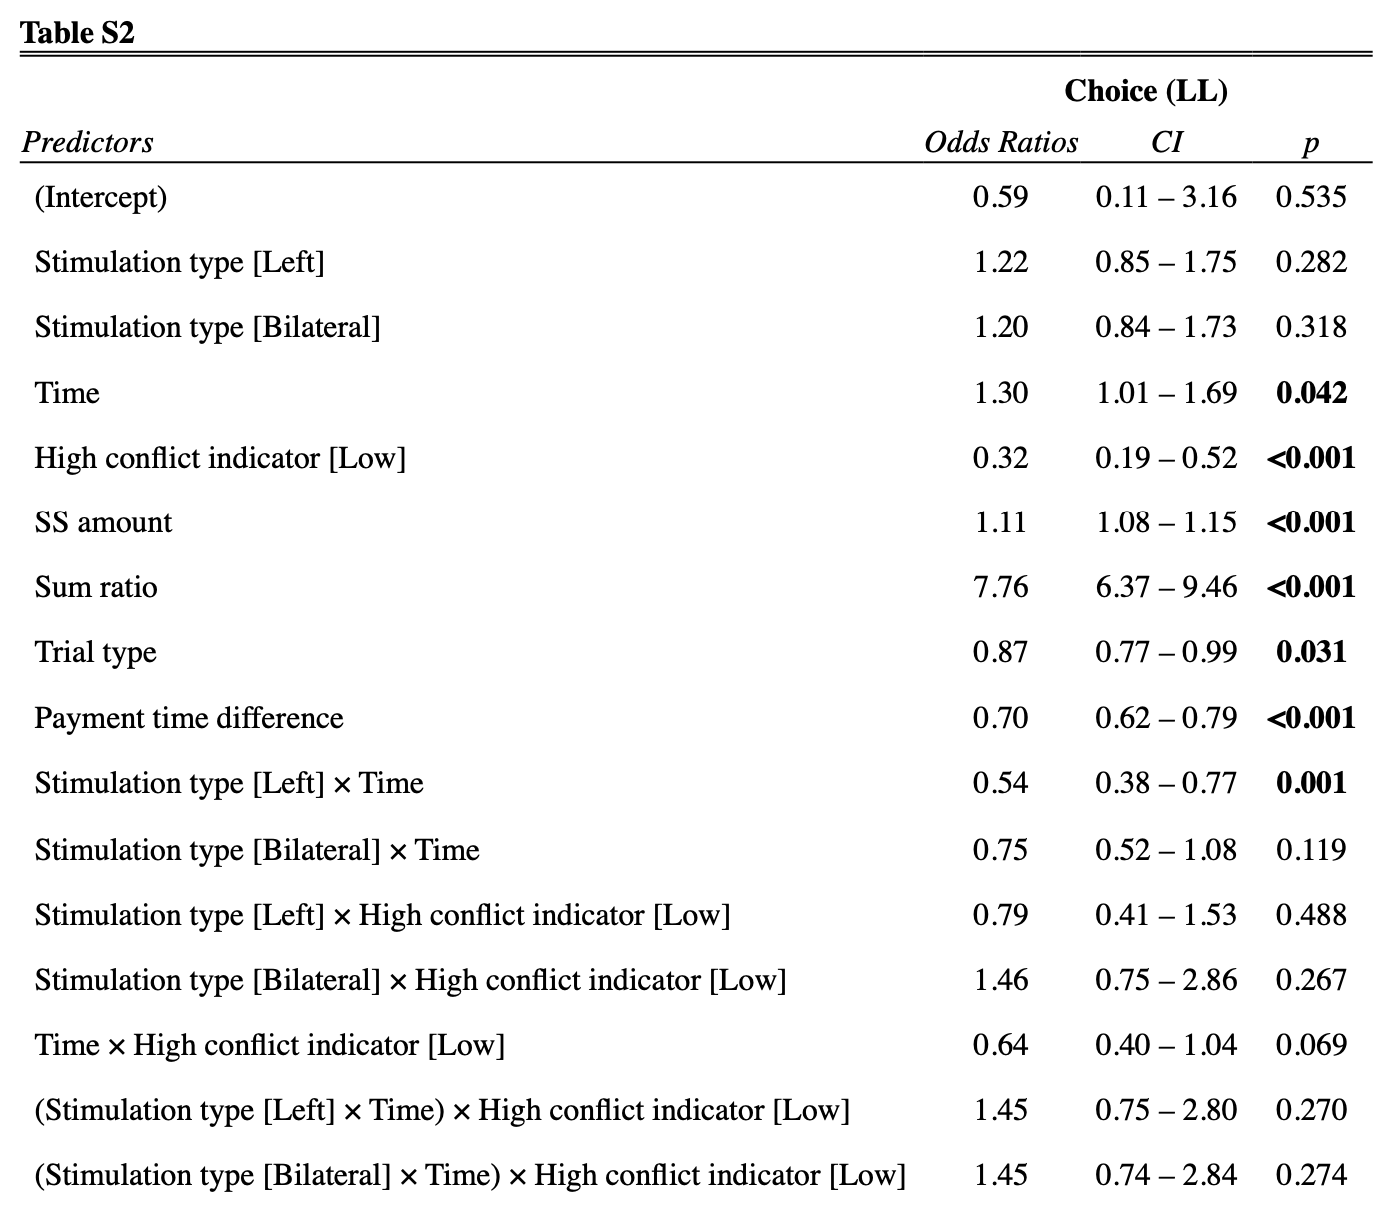


**Type II Wald Chi-Square Tests for the Mixed-Effects Linear Regression Model Predicting Negativty ratings in response to social isolation images..**


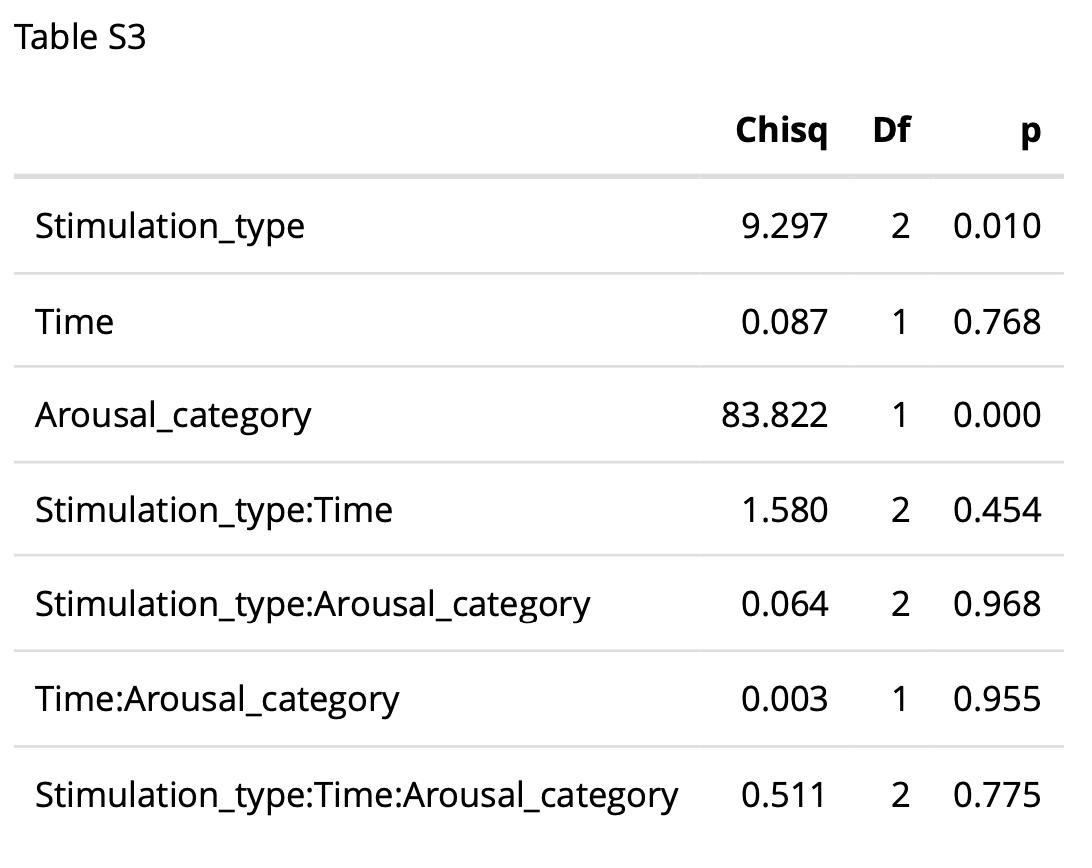

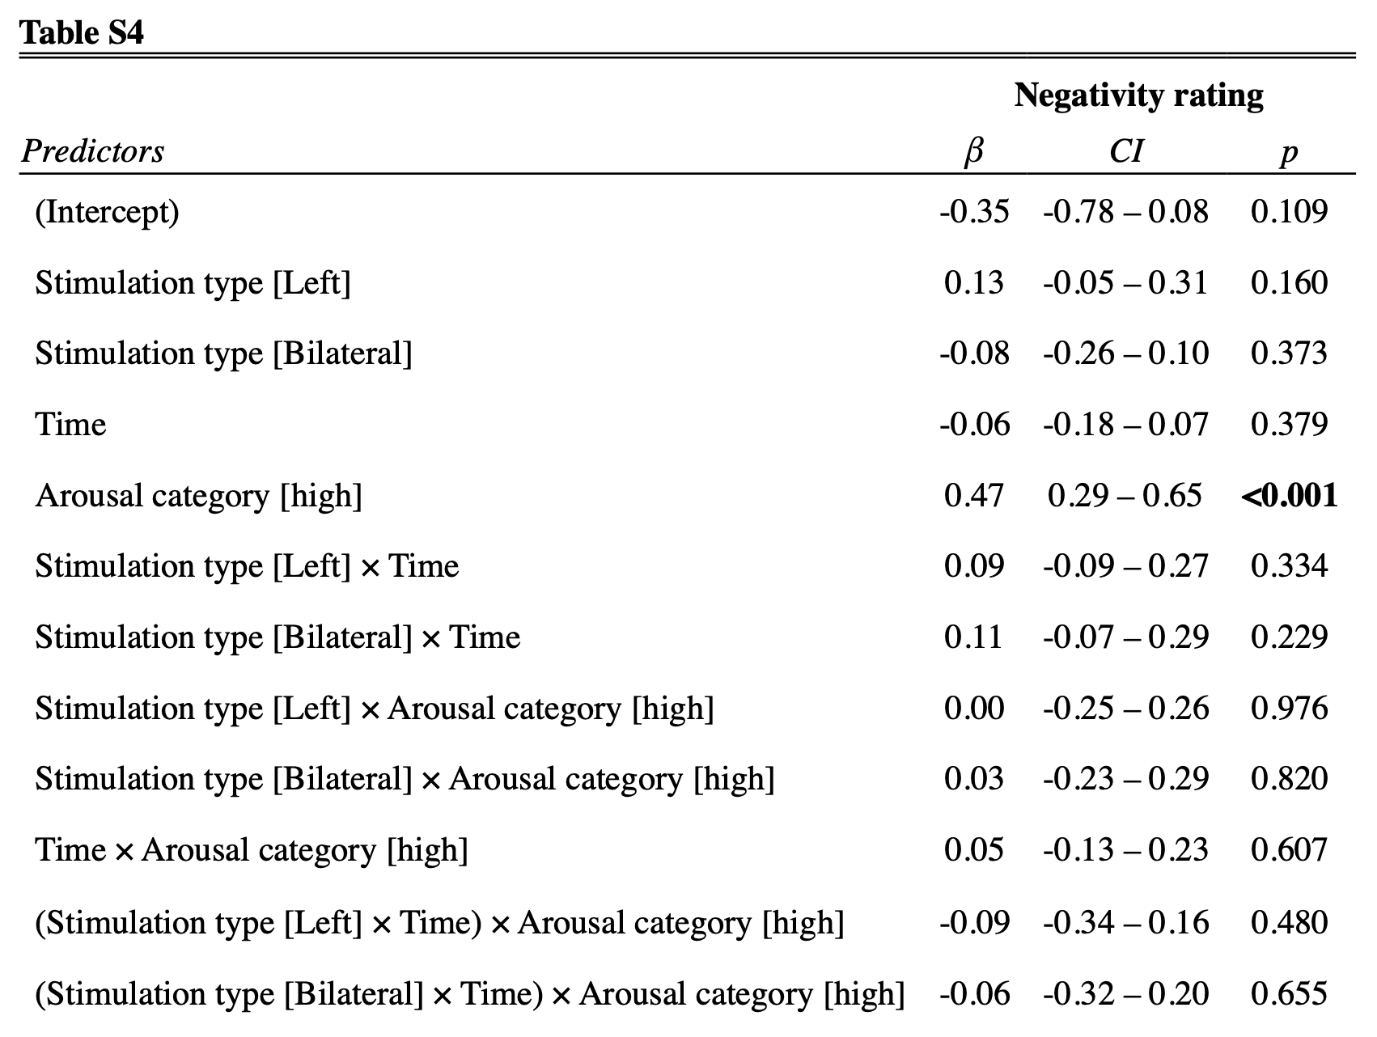


**Linear Regression Model Predicting Negativty ratings in response to social isolation images. Right vlPFC stimulation and Low arousal image category used as baseline levels.**

**Refrence**
